# Supplementary material for: A water soluble extract of radish greens ameliorates high fat diet-induced obesity in mice and inhibits adipogenesis in preadipocytes
Source: Royal Society of Chemistry journal article supplement (doi:10.1039/d1fo04152e), 2022-01-01

**Supplementary Table 1.** MS/MS parameters and estimated concentrations of glucoraphenin and ferulic acid in water-soluble extract from radish greens (WERG).

|               | Precursor<br><i>m/z</i> | Product<br><i>m/z</i> | Cone<br>voltage (V) | Collision<br>energy (V) | LOQ<br>(ng/mL) | Estimated<br>Conc. (µg/mg<br>extract) |
|---------------|-------------------------|-----------------------|---------------------|-------------------------|----------------|---------------------------------------|
| Glucoraphenin | 434.0                   | 96.8                  | 26                  | 22                      | 2.02           | 3.36 ± 0.19                           |
| Ferulic acid  | 195.1                   | 145.0                 | 12                  | 16                      | 19.32          | 0.59 ± 0.04                           |

**Supplementary Fig. 1.** Extracted ion chromatograms (EICs) of glucoraphenin and ferulic acid in the extract (top) and standard solution (bottom)

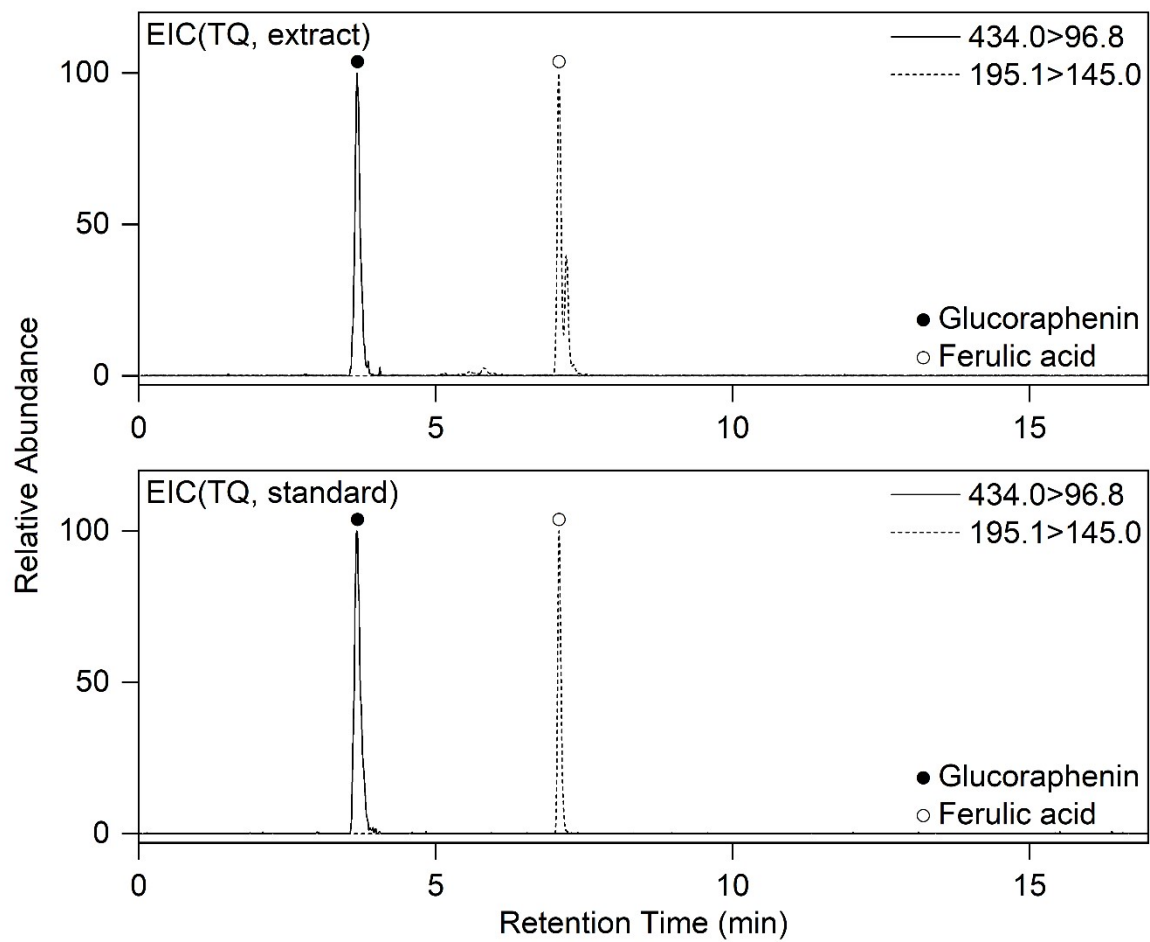

Supplement: d1fo04152e1.pdf [file d1fo04152e1.pdf]
